# Supplementary material for: Local force constants and charges of the nitrosyl ligand in photoinduced NO linkage isomers in a prototypical ruthenium nitrosyl complex
Source: Royal Society of Chemistry journal article supplement (doi:10.1039/d4cp01374c), 2024-01-01
Supplement: d4cp01374c1.pdf [file d4cp01374c1.pdf]

## Supplementary material

### Local force constants and charges of the nitrosyl ligand in photoinduced NO linkage isomers in a prototypical ruthenium nitrosyl complex

Artem A. Mikhailov<sup>1\*</sup>, Axel Gansmüller<sup>1</sup>, Krzysztof A. Konieczny<sup>1,2</sup>, Sébastien Pillet<sup>1</sup>, Gennadiy Kostin<sup>3</sup>, Peter Klüfers<sup>4</sup>, Theo Woike<sup>1</sup>, Dominik Schaniel<sup>1\*</sup>

<sup>1</sup> Université de Lorraine, CNRS, CRM2, F-54000 Nancy, France

<sup>2</sup> Faculty of Chemistry, Wrocław University of Science and Technology, Wybrzeże Wyspińskiego 27, 50-370 Wrocław, Poland

<sup>3</sup> Nikolaev Institute of Inorganic Chemistry, Siberian Branch of the Russian Academy of Science, Novosibirsk, 630090 Russia

<sup>4</sup> Department of Chemistry, Ludwig-Maximilians-Universität, Butenandtstrasse 5–13, München 81377

Table S1. Experimental and refinement details of XRD data.

|                                    |                                                               |
|------------------------------------|---------------------------------------------------------------|
| Complex                            | K <sub>2</sub> [RuCl <sub>5</sub> NO]                         |
| Empirical formula                  | Cl <sub>5</sub> K <sub>2</sub> NORu                           |
| Formula weight                     | 386.530                                                       |
| Temperature/K                      | 100                                                           |
| Crystal system                     | orthorhombic                                                  |
| Space group                        | Pnma                                                          |
| a/Å                                | 13.1260(8)                                                    |
| b/Å                                | 10.3284(6)                                                    |
| c/Å                                | 6.8375(4)                                                     |
| α/°                                | 90                                                            |
| β/°                                | 90                                                            |
| γ/°                                | 90                                                            |
| Volume/Å <sup>3</sup>              | 926.96(10)                                                    |
| Z                                  | 4                                                             |
| ρ <sub>calc</sub> /cm <sup>3</sup> | 2.770                                                         |
| μ/mm <sup>-1</sup>                 | 3.962                                                         |
| F(000)                             | 727.8                                                         |
| Crystal size/mm <sup>3</sup>       | 0.388 × 0.313 × 0.165                                         |
| Radiation                          | Mo Kα (λ = 0.71073)                                           |
| 2θ range for data collection/°     | 6.2 to 90.86                                                  |
| Index ranges                       | -26 ≤ h ≤ 26, -20 ≤ k ≤ 20, -13 ≤ l ≤ 13                      |
| Reflections collected              | 303016                                                        |
| Independent reflections            | 4040 [R <sub>int</sub> = 0.0644, R <sub>sigma</sub> = 0.0124] |
| Data/restraints/parameters         | 4040/0/56                                                     |
| Goodness-of-fit on F <sup>2</sup>  | 1.025                                                         |
| Final R indexes [I ≥ 2σ (I)]       | R <sub>1</sub> = 0.0150, wR <sub>2</sub> = 0.0289             |
| Final R indexes [all data]         | R <sub>1</sub> = 0.0161, wR <sub>2</sub> = 0.0292             |

Table S2. Coordinates of optimized structure of  $K_2[RuCl_5NO]$  in GS.

|    |           |           |           |
|----|-----------|-----------|-----------|
| N  | 6.250687  | 7.798187  | 3.402009  |
| O  | 5.471137  | 7.798187  | 4.249947  |
| Cl | 9.510492  | 7.798187  | 0.953023  |
| Cl | 6.288256  | 7.798187  | 0.306022  |
| Cl | 9.049101  | 7.798187  | 4.169136  |
| Cl | 7.649163  | 5.421258  | 2.211724  |
| K  | 10.718400 | 5.173700  | 2.433372  |
| Ru | 7.575785  | 7.798187  | 2.294895  |
| Cl | 7.649163  | 10.175115 | 2.211724  |
| K  | 10.718400 | 10.422674 | 2.433372  |
| Cl | 9.275040  | 2.599396  | 4.273520  |
| Cl | 9.275040  | 12.996978 | 4.273520  |
| Cl | 12.497275 | 2.599396  | 3.626519  |
| Cl | 12.497275 | 12.996978 | 3.626519  |
| Cl | 12.550100 | 7.798187  | 3.014475  |
| Cl | 9.736431  | 2.599396  | 0.848639  |
| Cl | 9.736431  | 12.996978 | 0.848639  |
| Cl | 11.136369 | 4.976324  | -1.108773 |
| Cl | 11.136369 | 4.976324  | 5.532221  |
| Cl | 13.911006 | 5.421258  | 1.108773  |
| Cl | 11.136369 | 10.620049 | -1.108773 |
| Cl | 11.136369 | 10.620049 | 5.532221  |
| Cl | 13.911006 | 10.175115 | 1.108773  |
| K  | 8.067132  | 5.223883  | -0.887125 |
| K  | 8.067132  | 5.223883  | 5.753869  |
| K  | 4.456556  | 5.173700  | 0.887125  |
| K  | 8.067132  | 10.372491 | -0.887125 |
| K  | 8.067132  | 10.372491 | 5.753869  |
| K  | 4.456556  | 10.422674 | 0.887125  |

Table S3. Coordinates of optimized structure of  $K_2[RuCl_5NO]$  in MS1.

|    |           |           |           |
|----|-----------|-----------|-----------|
| N  | 5.438398  | 7.739915  | 4.218477  |
| O  | 6.234049  | 7.739915  | 3.383129  |
| Cl | 9.544429  | 7.739915  | 0.909953  |
| Cl | 6.300118  | 7.739915  | 0.271974  |
| Cl | 9.066516  | 7.739915  | 4.122604  |
| Cl | 7.694801  | 5.360557  | 2.186427  |
| K  | 10.788393 | 5.152396  | 2.404929  |
| Ru | 7.658524  | 7.739915  | 2.223517  |
| Cl | 7.694801  | 10.119274 | 2.186427  |
| K  | 10.788393 | 10.327435 | 2.404929  |
| Cl | 9.359295  | 2.579972  | 4.208281  |
| Cl | 9.359295  | 12.899859 | 4.208281  |
| Cl | 12.603605 | 2.579972  | 3.570302  |
| Cl | 12.603605 | 12.899859 | 3.570302  |
| Cl | 12.601360 | 7.739915  | 3.026354  |
| Cl | 9.837207  | 2.579972  | 0.824276  |
| Cl | 9.837207  | 12.899859 | 0.824276  |
| Cl | 11.208922 | 4.959330  | -1.111901 |
| Cl | 11.208922 | 4.959330  | 5.484755  |
| Cl | 13.996042 | 5.360557  | 1.111901  |
| Cl | 11.208922 | 10.520500 | -1.111901 |
| Cl | 11.208922 | 10.520500 | 5.484755  |
| Cl | 13.996042 | 10.119274 | 1.111901  |
| K  | 8.115330  | 5.167492  | -0.893399 |
| K  | 8.115330  | 5.167492  | 5.703257  |
| K  | 4.487152  | 5.152396  | 0.893399  |
| K  | 8.115330  | 10.312339 | -0.893399 |
| K  | 8.115330  | 10.312339 | 5.703257  |
| K  | 4.487152  | 10.327435 | 0.893399  |

Table S4. Coordinates of optimized structure of  $K_2[RuCl_5NO]$  in MS2 corresponding to NO-Cl3 geometry.

|    |           |           |           |
|----|-----------|-----------|-----------|
| N  | 6.153126  | 2.478922  | 2.785817  |
| N  | 6.956348  | 7.436632  | 3.791866  |
| O  | 5.964021  | 7.436995  | 3.104989  |
| O  | 7.145653  | 2.478885  | 3.472389  |
| Cl | 7.866515  | 5.062708  | 2.020191  |
| Cl | 11.797932 | 4.852956  | 5.309161  |
| Cl | 5.242996  | 0.104996  | 4.557815  |
| Cl | 1.311593  | 9.810801  | 1.268667  |
| Cl | 5.243267  | 4.853024  | 4.557574  |
| Cl | 1.311824  | 5.062770  | 1.268887  |
| Cl | 7.866723  | 9.810684  | 2.020208  |
| Cl | 11.798189 | 0.104963  | 5.309012  |
| Cl | 9.698653  | 7.436606  | 0.697711  |
| Cl | 6.550571  | 7.436746  | 0.180360  |
| Cl | 9.659139  | 7.436608  | 3.780403  |
| Cl | 9.966027  | 2.478817  | 3.986650  |
| Cl | 13.114138 | 2.479112  | 3.469273  |
| Cl | 10.005622 | 2.478756  | 0.491460  |
| Cl | 3.411319  | 2.479176  | 5.880308  |
| Cl | 6.559544  | 2.479027  | 6.397291  |
| Cl | 3.450413  | 2.478922  | 2.797728  |
| Cl | 3.143518  | 7.436977  | 2.591471  |
| Cl | -0.004709 | 7.436799  | 3.108366  |
| Cl | 3.104356  | 7.436845  | 6.086631  |
| K  | 11.026977 | 4.950202  | 2.214867  |
| K  | 8.637214  | 4.965156  | 5.503813  |
| K  | 2.082295  | 9.908460  | 4.362967  |
| K  | 4.472059  | 0.007545  | 1.074185  |
| K  | 2.082800  | 4.965417  | 4.363060  |
| K  | 4.472524  | 4.950543  | 1.074091  |
| K  | 11.027494 | 0.007259  | 2.214958  |
| K  | 8.637737  | 9.908106  | 5.503733  |
| Ru | 7.861395  | 7.436722  | 2.121198  |
| Ru | 11.803298 | 2.479006  | 5.410096  |
| Ru | 5.248427  | 2.478976  | 4.456666  |
| Ru | 1.306459  | 7.436745  | 1.167757  |
| N  | 12.708314 | 2.478819  | 7.080772  |
| O  | 13.700672 | 2.479424  | 6.393938  |
| N  | 0.401757  | 7.436643  | -0.503092 |
| O  | -0.590747 | 7.436536  | 0.183513  |
| Cl | 7.866418  | 5.062843  | 8.598029  |
| Cl | -1.311890 | 4.852956  | 5.309161  |
| Cl | 11.798030 | 4.852821  | -1.268676 |
| Cl | 5.243094  | 0.104861  | -2.020023 |
| Cl | 5.243045  | 10.020575 | 4.557815  |
| Cl | 1.311545  | -0.104779 | 1.268667  |
| Cl | 1.311496  | 9.810936  | 7.846505  |
| Cl | 14.421367 | -0.104779 | 1.268667  |
| Cl | 5.243365  | 4.852889  | -2.020263 |
| Cl | 1.311727  | 5.062905  | 7.846725  |
| Cl | 14.421646 | 5.062770  | 1.268887  |
| Cl | 7.866675  | -0.104895 | 2.020208  |
| Cl | 7.866625  | 9.810819  | 8.598045  |
| Cl | -1.311585 | 10.020543 | 5.309012  |
| Cl | 11.798286 | 0.104829  | -1.268826 |
| Cl | 11.798237 | 10.020543 | 5.309012  |
| Cl | 9.698604  | -2.478973 | 0.697711  |
| Cl | 9.698555  | 7.436741  | 7.275549  |
| Cl | 6.550523  | -2.478833 | 0.180360  |
| Cl | 6.550473  | 7.436881  | 6.758198  |
| Cl | 9.659091  | -2.478972 | 3.780403  |
| Cl | 9.966075  | 12.394396 | 3.986650  |
| Cl | 0.004316  | 2.479112  | 3.469273  |
| Cl | 0.004364  | 12.394692 | 3.469273  |
| Cl | 10.005525 | 2.478891  | 7.069298  |
| Cl | 10.005573 | 12.394471 | 7.069298  |

|    |           |           |           |
|----|-----------|-----------|-----------|
| Cl | 3.411417  | 2.479041  | -0.697529 |
| Cl | 3.411368  | 12.394755 | 5.880308  |
| Cl | 6.559642  | 2.478892  | -0.180547 |
| Cl | 6.559592  | 12.394606 | 6.397291  |
| Cl | 3.450461  | 12.394502 | 2.797728  |
| Cl | 3.143470  | -2.478602 | 2.591471  |
| Cl | 13.105065 | -2.478781 | 3.108366  |
| Cl | 13.105113 | 7.436799  | 3.108366  |
| Cl | 3.104405  | -2.478869 | -0.491207 |
| Cl | 3.104453  | 7.436711  | -0.491207 |
| K  | -2.082845 | 4.950202  | 2.214867  |
| K  | 11.026879 | 4.950337  | 8.792705  |
| K  | 8.637312  | 4.965022  | -1.074025 |
| K  | 2.082246  | -0.007119 | 4.362967  |
| K  | 2.082392  | 9.908326  | -2.214870 |
| K  | 15.192068 | -0.007119 | 4.362967  |
| K  | 4.471961  | 0.007680  | 7.652023  |
| K  | 4.472107  | 9.923125  | 1.074185  |
| K  | 4.472009  | 9.923259  | 7.652023  |
| K  | 2.082897  | 4.965282  | -2.214778 |
| K  | 15.192622 | 4.965417  | 4.363060  |
| K  | 4.472426  | 4.950678  | 7.651928  |
| K  | -2.082280 | 9.922839  | 2.214958  |
| K  | 11.027396 | 0.007394  | 8.792795  |
| K  | 11.027542 | 9.922839  | 2.214958  |
| K  | 8.637786  | -0.007608 | -1.074105 |
| K  | 8.637688  | -0.007474 | 5.503733  |
| K  | 8.637834  | 9.907971  | -1.074105 |
| Ru | 11.803396 | 2.478871  | -1.167741 |
| Ru | 1.306361  | 7.436880  | 7.745595  |

Table S5. Coordinates of optimized structure of  $K_2[RuCl_5NO]$  in MS2 corresponding to NO-Cl1 geometry.

|    |           |           |          |
|----|-----------|-----------|----------|
| N  | 6.767165  | 2.470268  | 3.740392 |
| N  | 6.031624  | 7.459801  | 3.171516 |
| O  | 6.306346  | 2.473287  | 2.625864 |
| O  | 6.622404  | 7.451512  | 4.227239 |
| Cl | 7.882263  | 5.086303  | 2.432446 |
| Cl | 11.255291 | 4.843330  | 5.613310 |
| Cl | 4.861552  | 0.094988  | 4.294988 |
| Cl | 1.468250  | 9.826677  | 0.868949 |
| Cl | 4.862049  | 4.847471  | 4.300009 |
| Cl | 1.469543  | 5.084285  | 0.865394 |
| Cl | 7.887772  | 9.829420  | 2.444690 |
| Cl | 11.258062 | 0.106520  | 5.598559 |
| Cl | 9.444945  | 7.461415  | 0.805648 |
| Cl | 6.376656  | 7.463286  | 0.484773 |
| Cl | 9.588805  | 7.452334  | 3.980407 |
| Cl | 9.709671  | 2.481522  | 4.020263 |
| Cl | 12.762495 | 2.479041  | 3.644560 |
| Cl | 9.731605  | 2.470307  | 0.611786 |
| Cl | 3.167413  | 2.469016  | 5.760363 |
| Cl | 6.184162  | 2.470554  | 6.369054 |
| Cl | 3.296600  | 2.474062  | 2.585113 |
| Cl | 3.075355  | 7.454125  | 2.426226 |
| Cl | 0.018454  | 7.454626  | 2.850905 |
| Cl | 2.989539  | 7.457642  | 5.855010 |
| K  | 11.019380 | 4.954374  | 2.308601 |
| K  | 8.108363  | 4.940309  | 5.892805 |
| K  | 1.750144  | 9.918959  | 4.083509 |
| K  | 4.572922  | 0.014114  | 0.942290 |
| K  | 1.751530  | 4.996657  | 4.086327 |
| K  | 4.573869  | 4.934026  | 0.939756 |
| K  | 11.020863 | -0.008472 | 2.308169 |
| K  | 8.107291  | 9.973845  | 5.894546 |
| Ru | 7.797898  | 7.457882  | 2.449651 |
| Ru | 11.363001 | 2.474662  | 5.624135 |

|    |           |           |           |
|----|-----------|-----------|-----------|
| Ru | 4.941336  | 2.471323  | 4.285169  |
| Ru | 1.378254  | 7.455634  | 0.845525  |
| N  | -0.414987 | 7.455512  | 0.188100  |
| O  | 0.128059  | 7.458486  | -0.890098 |
| N  | 13.265085 | 2.478749  | -0.298782 |
| O  | 12.709010 | 2.465064  | 0.773476  |
| Cl | 7.758811  | 5.086135  | 9.044149  |
| Cl | 11.378743 | 4.843498  | -0.998392 |
| Cl | 4.985003  | 0.095156  | -2.316714 |
| Cl | 4.860857  | 10.063164 | 4.294988  |
| Cl | 1.468944  | -0.141499 | 0.868949  |
| Cl | 1.344799  | 9.826509  | 7.480651  |
| Cl | 4.985500  | 4.847639  | -2.311694 |
| Cl | 1.346092  | 5.084117  | 7.477097  |
| Cl | 7.888466  | -0.138756 | 2.444690  |
| Cl | 7.764320  | 9.829252  | 9.056392  |
| Cl | 11.381514 | 0.106688  | -1.013143 |
| Cl | 11.257368 | 10.074696 | 5.598559  |
| Cl | 9.445639  | -2.506761 | 0.805648  |
| Cl | 9.321494  | 7.461248  | 7.417350  |
| Cl | 6.377351  | -2.504890 | 0.484773  |
| Cl | 6.253205  | 7.463118  | 7.096475  |
| Cl | 9.589500  | -2.515842 | 3.980407  |
| Cl | 9.708977  | 12.449699 | 4.020263  |
| Cl | -0.103805 | 2.479041  | 3.644560  |
| Cl | -0.104499 | 12.447218 | 3.644560  |
| Cl | 9.608154  | 2.470139  | 7.223489  |
| Cl | 9.607459  | 12.438315 | 7.223489  |
| Cl | 3.290865  | 2.469184  | -0.851339 |
| Cl | 3.166719  | 12.437192 | 5.760363  |
| Cl | 6.307614  | 2.470722  | -0.242648 |
| Cl | 6.183468  | 12.438730 | 6.369054  |
| Cl | 3.295905  | 12.442238 | 2.585113  |
| Cl | 3.076049  | -2.514051 | 2.426226  |
| Cl | 12.885448 | -2.513550 | 2.850905  |
| Cl | 12.884753 | 7.454626  | 2.850905  |
| Cl | 3.113685  | -2.510367 | -0.756692 |
| Cl | 3.112990  | 7.457810  | -0.756692 |
| K  | -1.846920 | 4.954374  | 2.308601  |
| K  | 10.895929 | 4.954206  | 8.920303  |
| K  | 8.231815  | 4.940477  | -0.718898 |
| K  | 1.750839  | -0.049217 | 4.083509  |
| K  | 1.873596  | 9.919127  | -2.528193 |
| K  | 14.617139 | -0.049217 | 4.083509  |
| K  | 4.449471  | 0.013946  | 7.553993  |
| K  | 4.572228  | 9.982290  | 0.942290  |
| K  | 4.448776  | 9.982122  | 7.553993  |
| K  | 1.874981  | 4.996825  | -2.525375 |
| K  | 14.617830 | 4.996657  | 4.086327  |
| K  | 4.450418  | 4.933858  | 7.551459  |
| K  | -1.846131 | 9.959704  | 2.308169  |
| K  | 10.897412 | -0.008640 | 8.919872  |
| K  | 11.020169 | 9.959704  | 2.308169  |
| K  | 8.231436  | 0.005837  | -0.717157 |
| K  | 8.107985  | 0.005669  | 5.894546  |
| K  | 8.230742  | 9.974013  | -0.717157 |
| Ru | 11.486452 | 2.474830  | -0.987568 |
| Ru | 1.254802  | 7.455466  | 7.457227  |
| N  | 13.141634 | 2.478581  | 6.312920  |
| O  | 12.585559 | 2.464896  | 7.385178  |

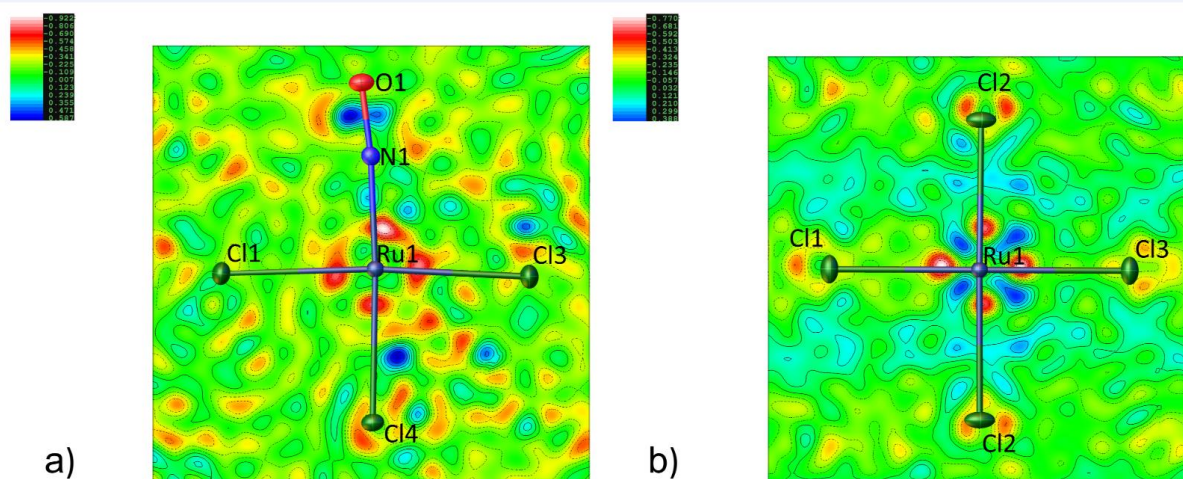

Fig. S1. Fourier-difference maps for  $K_2[RuCl_5NO]$ . a) Plane containing the RuNO axis, illustrating the depletion of the Ru  $4d_{z^2}$  orbital. b) Equatorial plane, illustrating the depletion of the Ru  $4d_{x^2-y^2}$  and population of the Ru  $4d_{xy}$ .

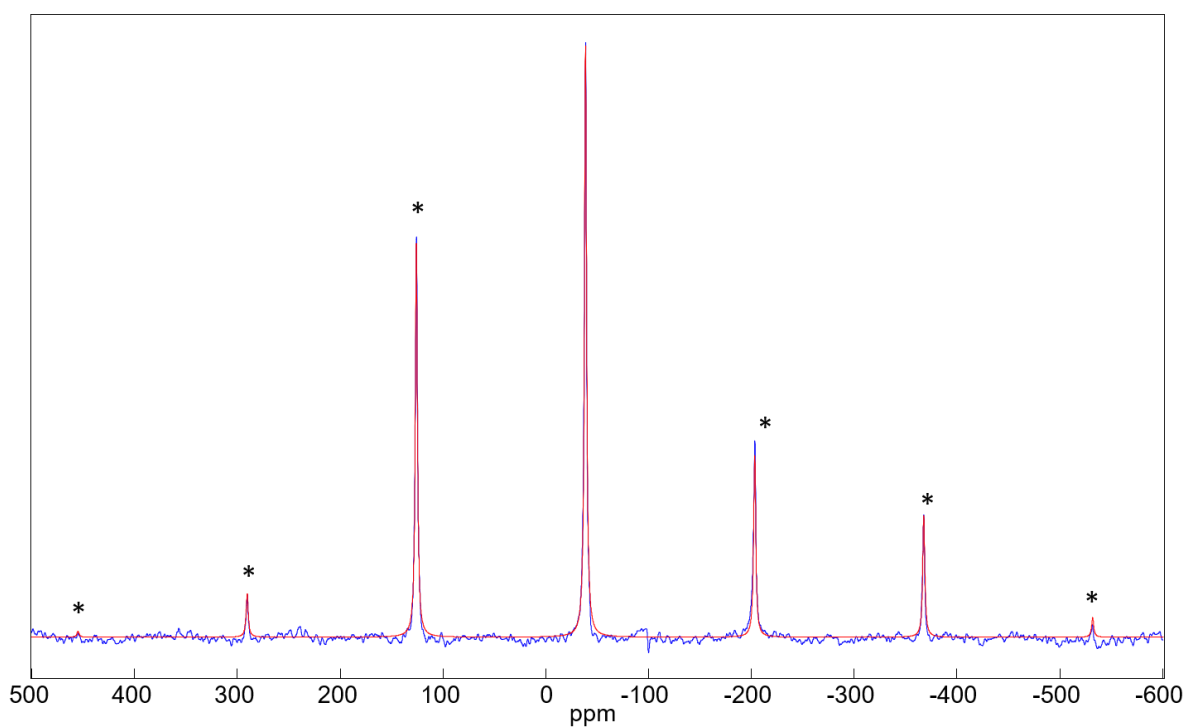

Fig. S2.  $^{15}N$  spectrum of  $K_2[RuCl_5NO]$  at  $\nu_{MAS}=10\text{kHz}$  referenced to Nitromethane. The experimental spectrum is plotted in blue whereas the fit is plotted in red. MAS spinning sidebands are marked by asterisks.

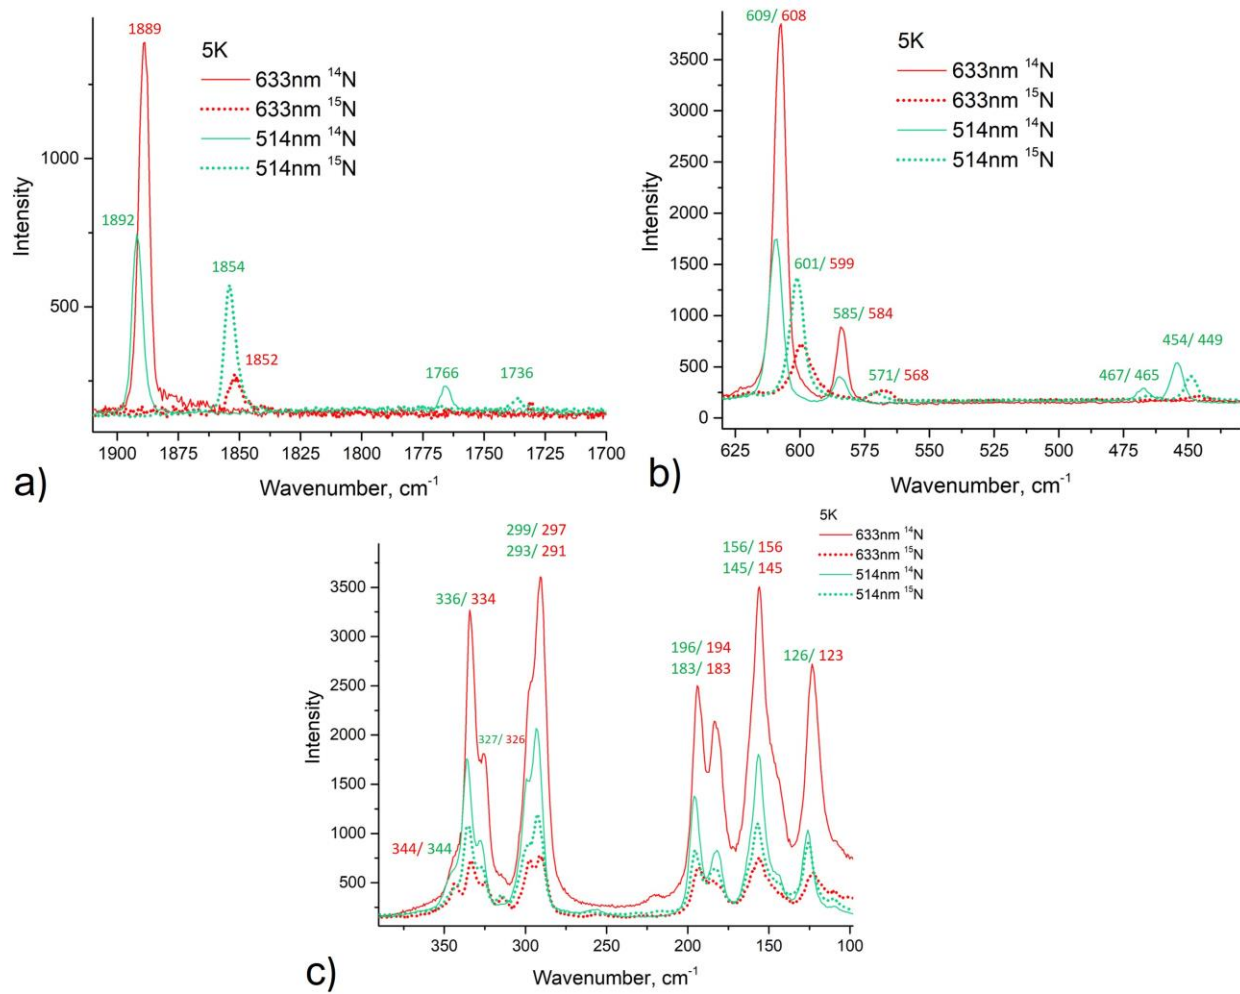

Fig. S3. Raman spectra of  $K_2[RuCl_5^{14/15}NO]$  samples measured at 514 and 633 nm excitation wavelengths at 5 K.

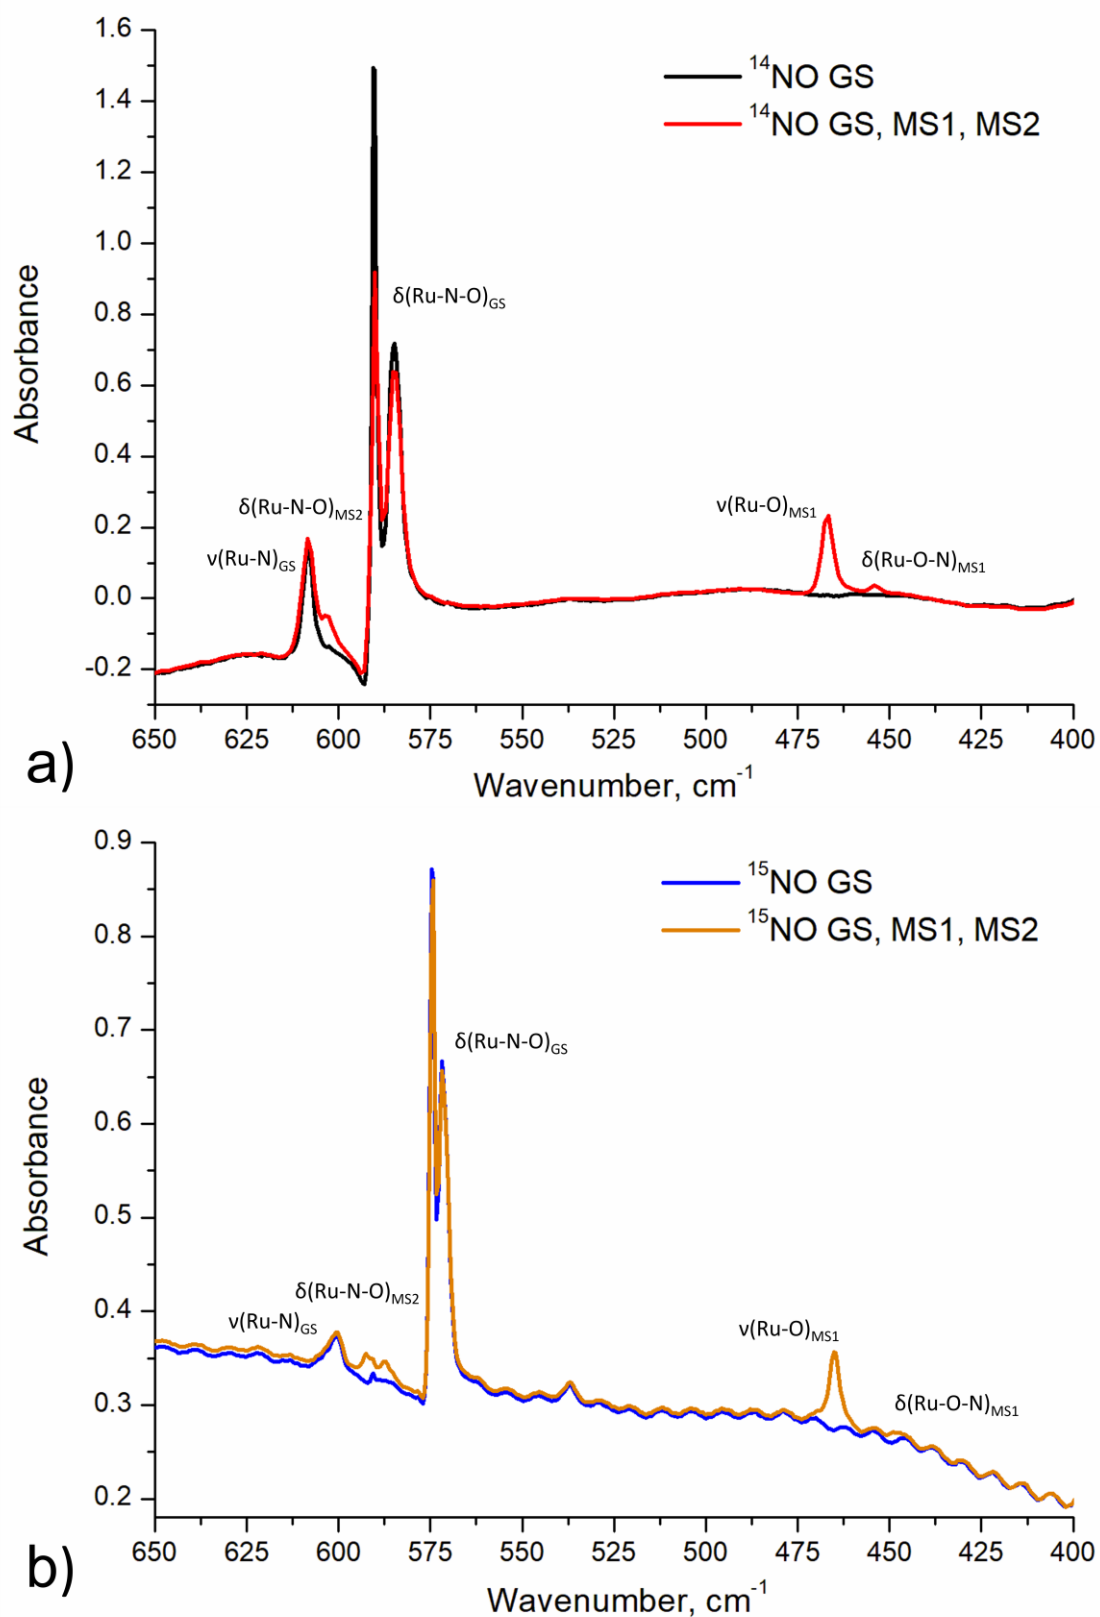

Fig. S4. Experimental IR spectra of GS, MS1 and MS2 in the spectral range 650–400  $\text{cm}^{-1}$ .



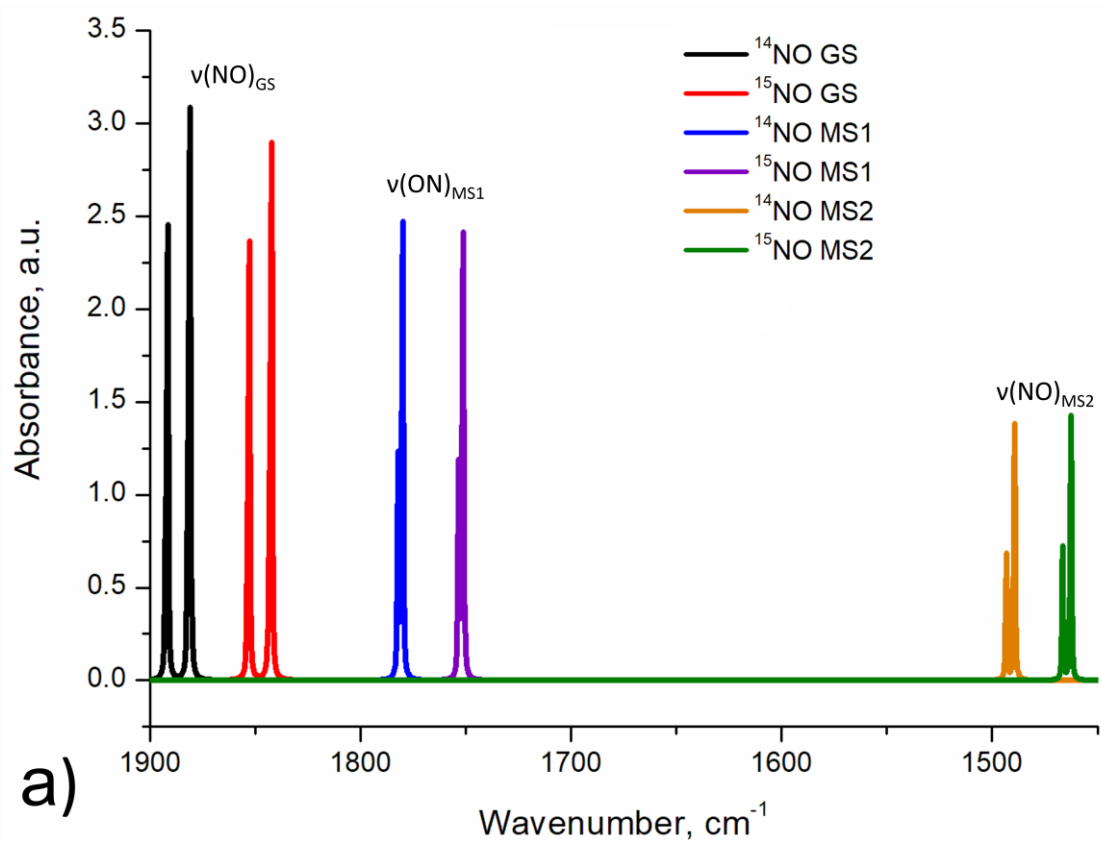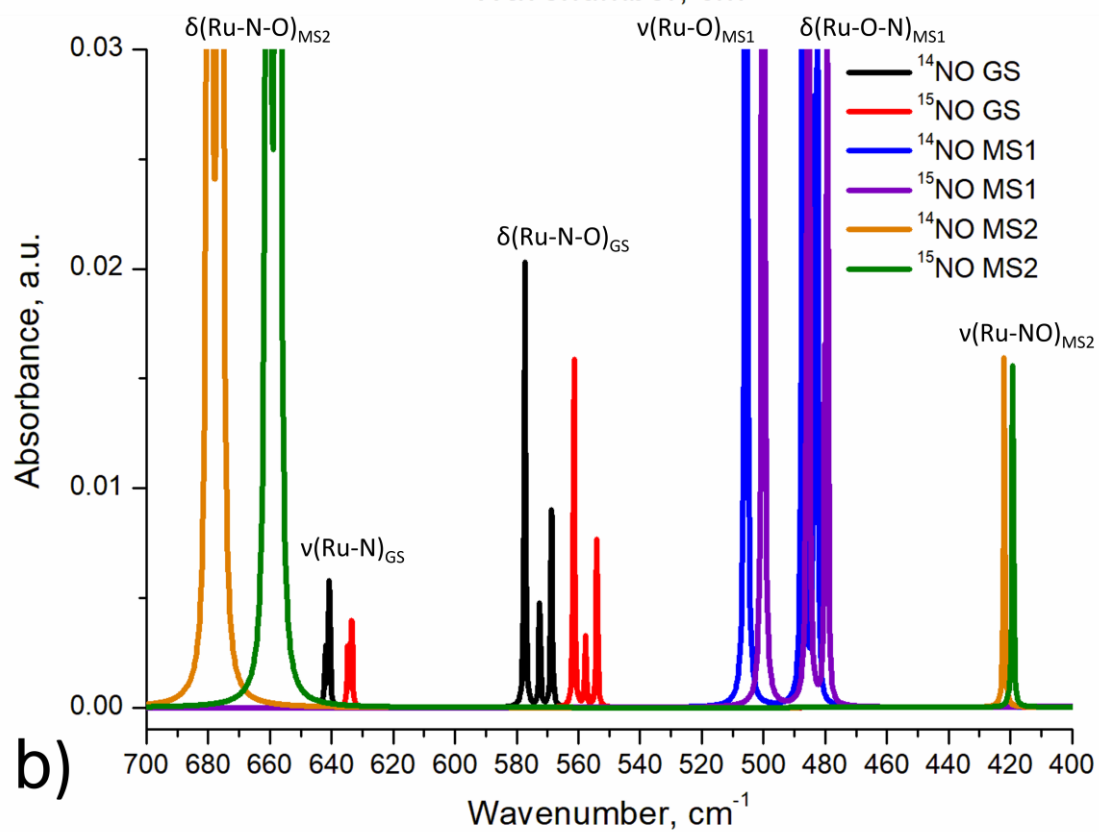

Fig. S5. CASTEP-calculated IR spectra of GS, MS1 and MS2 in spectral ranges of 1900–1450 (panel a) and 700–400  $\text{cm}^{-1}$  (panel b).

Inspecting in more detail the distribution of the charges into the atomic orbitals using the Mulliken population analysis performed by the CASTEP code, one can get some insight into the orbital populations in the different isomers, as listed in Table S6. One must be aware that the Mulliken charges and Bader charges are based on different partitions and thus do not describe exactly the same physics. Therefore, we consider only situations where large changes in the Mulliken populations occur.

Let us have a look at the charge redistribution in the RuNO moiety through occupation of the atomic orbitals. In both MS2 and MS1 the occupation of the N(2s) orbital increases by 15%, while the occupation of the O(2s) orbital increases by 1.3% in MS2 and decreases by 4.9% in MS1. The N(2p) occupation is decreased by 4.2% in MS2 and by 7.2% in MS1, while the O(2p) occupation is almost constant in MS2 (+0.6%) and increases slightly by +1.6% in MS1. Overall, we observe an increase of the N(2s) occupation, a decrease of the N(2p) occupation and a slight increase of the O(2s) and O(2p) occupation for MS2. For MS1, we can state that the charge redistribution between N and O occurs through an increase in N(2s), a decrease in N(2p) and O(2s) and a slight increase in O(2p).

Concerning the occupation of the ruthenium metal d orbitals, we find that for MS2 the Ru( $d_{xz}$ ) and Ru( $d_{yz}$ ) exchange their population. The GS situation  $4d_{yz} > 4d_{xz}$  is inverted in MS2 to  $4d_{xz} > 4d_{yz}$ , (z is along Cl4-Ru). As already shown in<sup>1,2</sup> and also measured and calculated via DMOL3 for  $[\text{Fe}(\text{CN})_5\text{NO}]^{2-}$ ,<sup>3</sup> the degenerate E levels based on the Ru(d) and  $\pi^*(\text{NO})$ -orbitals split when going from the ideal 4m symmetry with a linear M-N-O configuration to a bent M-N-O configuration. As a result, the energetic sequence in MS2 is  $E(d_{xz}) < E(d_{yz})$  und  $E(\pi^*_x) < E(\pi^*_y)$ . In fact, even in GS there is a small M-N-O angle, which increases in MS2 to result in a measurable splitting. The increase in occupation of the Ru( $4d_{xy}$ ) orbitals in MS2 and MS1 indicates a lowering in energy, so that we assume the following energetic sequence:

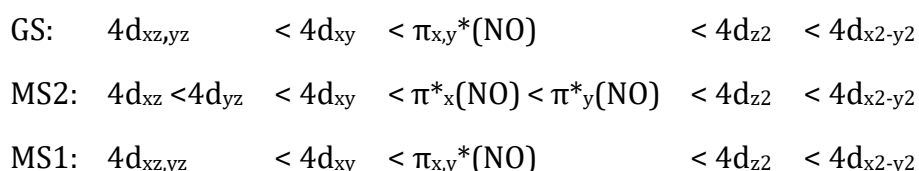

For the Cl ligands, the main changes in MS2 occur in the  $3p_x$  and  $3p_y$  orbitals, which almost compensate each other with their respective increase and decrease. For MS1 the changes are very small, as could be expected from the Bader-analysis.

Table S6: Mulliken-population analysis. The sign +/- in  $\Delta$  indicates increase/decrease of the orbital population compared to GS (MS-GS).

| Orbital             | GS    | MS2   | $\Delta$ | MS1   | $\Delta$ |
|---------------------|-------|-------|----------|-------|----------|
| N(2s)               | 1.536 | 1.765 | +0.229   | 1.769 | +0.233   |
| N(2p <sub>x</sub> ) | 1.089 | 0.974 | -0.115   | 1.036 | -0.053   |
| N(2p <sub>y</sub> ) | 1.147 | 0.975 | -0.172   | 1.054 | -0.093   |
| N(2p <sub>z</sub> ) | 1.111 | 1.256 | +0.146   | 1.016 | -0.095   |
| $\Sigma(2p)$        | 3.347 | 3.205 | -0.142   | 3.106 | -0.241   |
|                     |       |       |          |       |          |

|                                               |       |       |        |       |        |
|-----------------------------------------------|-------|-------|--------|-------|--------|
| O(2s)                                         | 1.824 | 1.847 | +0.023 | 1.734 | -0.090 |
| O(2p <sub>x</sub> )                           | 1.415 | 1.539 | +0.124 | 1.426 | +0.011 |
| O(2p <sub>y</sub> )                           | 1.502 | 1.381 | -0.121 | 1.518 | +0.016 |
| O(2p <sub>z</sub> )                           | 1.384 | 1.405 | +0.021 | 1.436 | +0.052 |
| Σ(2p)                                         | 4.301 | 4.325 | +0.024 | 4.380 | +0.079 |
|                                               |       |       |        |       |        |
| Ru(4s)                                        | 1.997 | 1.998 | ±0.000 | 1.998 | ±0.000 |
| Ru(4p <sub>x</sub> )                          | 1.992 | 1.998 | ±0.000 | 1.996 | ±0.000 |
| Ru(4p <sub>y</sub> )                          | 1.997 | 1.997 | ±0.000 | 1.998 | ±0.000 |
| Ru(4p <sub>z</sub> )                          | 1.994 | 1.995 | ±0.000 | 1.996 | ±0.000 |
|                                               |       |       |        |       |        |
| Ru(dz <sup>2</sup> )                          | 1.290 | 1.228 | -0.062 | 1.342 | +0.052 |
| Ru(d <sub>yz</sub> )                          | 1.776 | 0.956 | -0.820 | 1.824 | +0.048 |
| Ru(d <sub>xz</sub> )                          | 0.959 | 1.601 | +0.642 | 0.898 | -0.061 |
| Ru(d <sub>x<sup>2</sup>-y<sup>2</sup></sub> ) | 1.041 | 0.957 | -0.084 | 1.018 | -0.023 |
| Ru(d <sub>xy</sub> )                          | 1.675 | 1.986 | +0.311 | 1.730 | +0.055 |
| Σ(4d)                                         | 6.741 | 6.728 | -0.013 | 6.812 | +0.071 |
|                                               |       |       |        |       |        |
| Ru(5s)                                        | 0.480 | 0.469 | -0.011 | 0.472 | -0.008 |
| Ru(5p <sub>x</sub> )                          | 0.247 | 0.271 | +0.024 | 0.238 | -0.009 |
| Ru(5p <sub>y</sub> )                          | 0.264 | 0.248 | -0.016 | 0.264 | ±0.000 |
| Ru(5p <sub>z</sub> )                          | 0.254 | 0.274 | +0.020 | 0.246 | -0.008 |
|                                               |       |       |        |       |        |
| Cl <sub>4trans</sub> (3s)                     | 1.935 | 1.936 | +0.001 | 1.932 | -0.003 |
| Cl <sub>4trans</sub> (3p <sub>x</sub> )       | 1.704 | 1.925 | +0.221 | 1.676 | -0.028 |
| Cl <sub>4trans</sub> (3p <sub>y</sub> )       | 1.903 | 1.686 | -0.217 | 1.904 | +0.001 |
| Cl <sub>4trans</sub> (3p <sub>z</sub> )       | 1.803 | 1.747 | -0.056 | 1.784 | -0.019 |
|                                               |       |       |        |       |        |
| Cl <sub>3</sub> (3s)                          | 1.936 | 1.937 | +0.001 | 1.936 | ±0.000 |
| Cl <sub>3</sub> (3p <sub>x</sub> )            | 1.823 | 1.927 | +0.104 | 1.808 | -0.015 |
| Cl <sub>3</sub> (3p <sub>y</sub> )            | 1.926 | 1.787 | -0.139 | 1.922 | -0.004 |
| Cl <sub>3</sub> (3p <sub>z</sub> )            | 1.658 | 1.637 | -0.021 | 1.680 | +0.022 |
|                                               |       |       |        |       |        |
| Cl <sub>1</sub> (3s)                          | 1.937 | 1.941 | +0.004 | 1.934 | -0.003 |
| Cl <sub>1</sub> (3p <sub>x</sub> )            | 1.785 | 1.928 | +0.143 | 1.806 | +0.021 |
| Cl <sub>1</sub> (3p <sub>y</sub> )            | 1.930 | 1.722 | -0.208 | 1.928 | -0.002 |
| Cl <sub>1</sub> (3p <sub>z</sub> )            | 1.694 | 1.771 | +0.077 | 1.678 | -0.016 |
|                                               |       |       |        |       |        |
| Cl <sub>2</sub> (3s)                          | 1.936 | 1.936 | 0.000  | 1.936 | ±0.000 |
| Cl <sub>2</sub> (3p <sub>x</sub> )            | 1.932 | 1.562 | -0.370 | 1.928 | -0.004 |
| Cl <sub>2</sub> (3p <sub>y</sub> )            | 1.556 | 1.923 | +0.367 | 1.568 | +0.012 |
| Cl <sub>2</sub> (3p <sub>z</sub> )            | 1.930 | 1.923 | -0.007 | 1.928 | -0.002 |
|                                               |       |       |        |       |        |
| Cl <sub>2</sub> (3s)                          | 1.936 | 1.936 | ±0.000 | 1.936 | ±0.000 |
| Cl <sub>2</sub> (3p <sub>x</sub> )            | 1.932 | 1.562 | -0.370 | 1.928 | -0.004 |
| Cl <sub>2</sub> (3p <sub>y</sub> )            | 1.556 | 1.923 | +0.367 | 1.568 | +0.012 |
| Cl <sub>2</sub> (3p <sub>z</sub> )            | 1.930 | 1.923 | -0.007 | 1.928 | -0.002 |

- 1 J. H. Enemark and R. D. Feltham, Principles of structure, bonding, and reactivity for metal nitrosyl complexes, *Coordination Chemistry Reviews*, 1974, **13**, 339–406.
- 2 D. M. P. Mingos, General bonding model for linear and bent transition metal-nitrosyl complexes, *Inorg. Chem.*, 1973, **12**, 1209–1211.
- 3 D. Schaniel, J. Schefer, B. Delley, M. Imlau and Th. Woike, Light-induced absorption changes by excitation of metastable states in  $\text{Na}_2[\text{Fe}(\text{CN})_5\text{NO}]2\text{H}_2\text{O}$  single crystals, *Phys. Rev. B*, 2002, **66**, 085103.
